# Supplementary material for: Establishment and application of a gold nanoparticle-based immunochromatographic test strip for the detection of avian leukosis virus P27 antigen in egg white samples
Source: Royal Society of Chemistry journal article supplement (doi:10.1039/d4an00180j), 2024-01-01
Supplement: d4an00180j1.pdf [file d4an00180j1.pdf]

*Supporting Information*

**Establishment and application of a gold nanoparticle-based  
immunochromatographic test strip for the detection of avian leukosis  
virus P27 antigen in egg white**

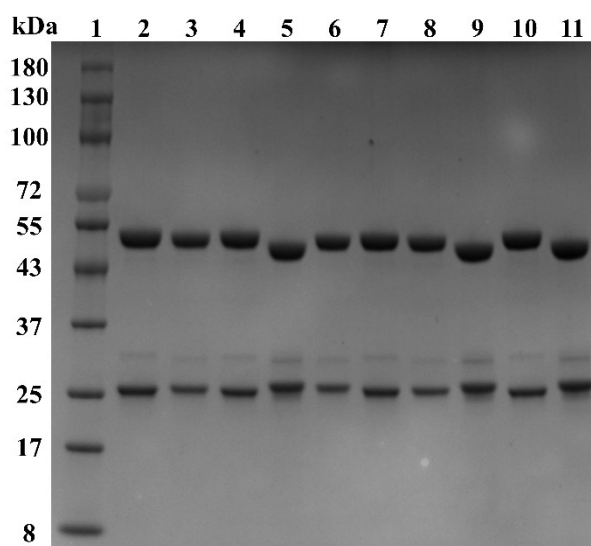

**Fig. S1** SDS-PAGE identification of mAbs. Lane 1: protein marker, Lane 2-13: mAb 1B5, 3D5, 5B6, 6H12, 7G1, 8C2, 9B12, 10D5, 11D6 and 12B6.

**Table S1.** P/N value a of different concentrations of capture antibody and detection antibody in sandwich ELISA optimization.

|      |                      | mAbs 3D5           |                    |                    |                    |
|------|----------------------|--------------------|--------------------|--------------------|--------------------|
|      | Concentration        | 8 $\mu\text{g/mL}$ | 4 $\mu\text{g/mL}$ | 2 $\mu\text{g/mL}$ | 1 $\mu\text{g/mL}$ |
|      | 4 $\mu\text{g/mL}$   | 6.03               | 4.99               | 3.95               | 2.51               |
| HRP- | 2 $\mu\text{g/mL}$   | 6.53               | 6.12               | 4.25               | 2.13               |
| 10D5 | 1 $\mu\text{g/mL}$   | 8.11               | 12.11              | 9.21               | 4.42               |
|      | 0.5 $\mu\text{g/mL}$ | 5.11               | 8.11               | 5.12               | 3.15               |

P/N value was the ratio of  $\text{OD}_{450}$  value of the positive to the negative control.

**Table S2. Stability of the AuNPs test strip stored at different temperatures for detecting P27.**

| Temperatures | 15 | 30  | 45 | 60 | 75 | 90 | 105 | 120 | 135 | 150 | 165 | 180 |
|--------------|----|-----|----|----|----|----|-----|-----|-----|-----|-----|-----|
| 4°C          | ++ | ++  | ++ | ++ | ++ | ++ | ++  | ++  | ++  | ++  | ++  | ++  |
| 25°C         | ++ | ++  | ++ | ++ | ±  | ±  | ±   | ±   | ±   | ±   | ±   | ±   |
| 37°C         | ++ | +++ | ±  | ±  | ±  | ±  | ±   | ±   | ±   | ±   | ±   | ±   |

“±” stands for weak positives and “++” stands for strong positives.
